# Supplementary material for: Practical Machine Learning Framework for Designing and Predicting C-Amidated Antimicrobial Peptides
Source: Research Square preprint supplement (doi:10.21203/rs.3.rs-7764304/v1), 2025-10-09
Supplement: Supplementary file 1 [file Supporting Information.pdf › Supporting Information/Supporting Information.pdf]

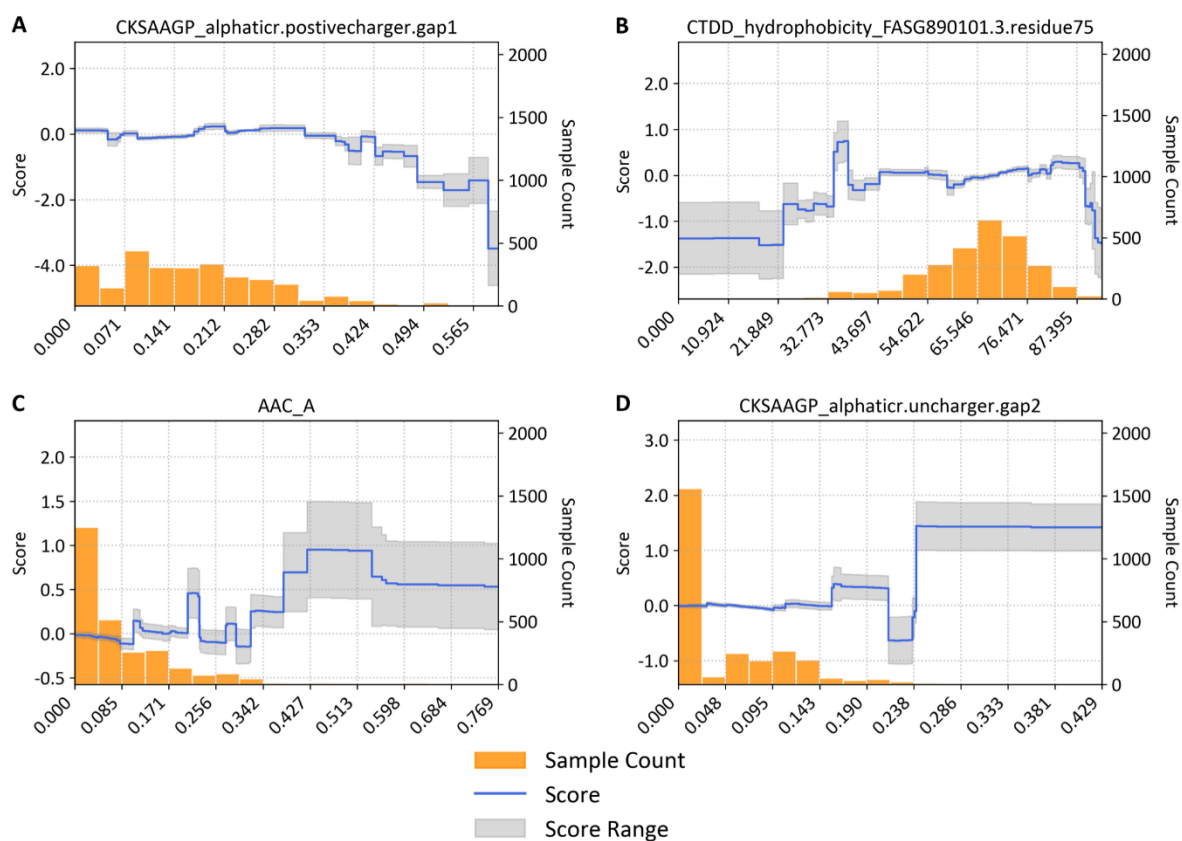

**Figure S1.** Univariate feature score plots from the selected EBM model, showing the features with minimal impact. The blue line shows the EBM score across value bins, where each bin represents a range of feature values. Orange bars indicate the number of samples in each bin. Gray shaded regions mark areas with limited or no data, where the model extrapolates. Larger gray regions indicate lower reliability of the score in those ranges.

**Table S1.** Results of all trials (7 feature combinations) using MIC threshold = 10  $\mu$ M.

| trials                 | features | <b>cross validation</b> | <b>training</b>   |        |           |        |         |        |        | <b>test</b>       |        |           |        |         |        |        |
|------------------------|----------|-------------------------|-------------------|--------|-----------|--------|---------|--------|--------|-------------------|--------|-----------|--------|---------|--------|--------|
|                        |          | F1                      | balanced accuracy | F1     | precision | recall | AUC-ROC | AUC-PR | MCC    | balanced accuracy | F1     | precision | recall | AUC-ROC | AUC-PR | MCC    |
| CTD_global             | 9        | 0.7744                  | 0.8714            | 0.8656 | 0.8621    | 0.869  | 0.9461  | 0.9435 | 0.7425 | 0.7521            | 0.7417 | 0.7358    | 0.7476 | 0.8365  | 0.8237 | 0.5038 |
| composition_global     | 11       | 0.7592                  | 0.8091            | 0.8074 | 0.7697    | 0.849  | 0.8968  | 0.8873 | 0.6183 | 0.7312            | 0.7295 | 0.6957    | 0.7668 | 0.8145  | 0.7921 | 0.4624 |
| composition_CTD        | 13       | 0.7733                  | 0.8521            | 0.8477 | 0.8274    | 0.869  | 0.9291  | 0.9168 | 0.7035 | 0.7309            | 0.7204 | 0.7125    | 0.7284 | 0.8129  | 0.7864 | 0.4614 |
| global                 | 4        | 0.7316                  | 0.8026            | 0.7956 | 0.7833    | 0.8083 | 0.8956  | 0.891  | 0.6045 | 0.753             | 0.7465 | 0.7273    | 0.7668 | 0.8242  | 0.8064 | 0.5053 |
| CTD                    | 13       | 0.7771                  | 0.8715            | 0.8673 | 0.8481    | 0.8874 | 0.9452  | 0.9386 | 0.7421 | 0.7602            | 0.7524 | 0.7385    | 0.7668 | 0.8353  | 0.8166 | 0.5198 |
| composition            | 10       | 0.7568                  | 0.8008            | 0.8015 | 0.7533    | 0.8562 | 0.8764  | 0.8547 | 0.6029 | 0.7246            | 0.7273 | 0.6816    | 0.7796 | 0.7837  | 0.7711 | 0.4503 |
| composition_CTD_global | 12       | 0.7894                  | 0.8661            | 0.8602 | 0.8555    | 0.865  | 0.9381  | 0.9331 | 0.7319 | 0.7616            | 0.7535 | 0.7407    | 0.7668 | 0.8322  | 0.8024 | 0.5227 |

**Table S2.** Results of all trials (7 feature combinations) using MIC threshold = 15  $\mu$ M.

| trials                 | features | <b>cross validation</b> | <b>training</b>   |        |           |        |         |        |        | <b>test</b>       |        |           |        |         |        |        |
|------------------------|----------|-------------------------|-------------------|--------|-----------|--------|---------|--------|--------|-------------------|--------|-----------|--------|---------|--------|--------|
|                        |          | F1                      | balanced accuracy | F1     | precision | recall | AUC-ROC | AUC-PR | MCC    | balanced accuracy | F1     | precision | recall | AUC-ROC | AUC-PR | MCC    |
| CTD_global             | 13       | 0.8332                  | 0.8469            | 0.8762 | 0.8537    | 0.9    | 0.9336  | 0.9492 | 0.7017 | 0.7574            | 0.8015 | 0.7816    | 0.8225 | 0.8243  | 0.8533 | 0.5203 |
| composition_global     | 7        | 0.8097                  | 0.7992            | 0.8444 | 0.8031    | 0.8902 | 0.8908  | 0.9114 | 0.6148 | 0.732             | 0.7916 | 0.75      | 0.8381 | 0.7864  | 0.8062 | 0.4782 |
| composition_CTD        | 7        | 0.809                   | 0.7855            | 0.8392 | 0.7845    | 0.902  | 0.8835  | 0.9062 | 0.5953 | 0.7006            | 0.7713 | 0.7221    | 0.8277 | 0.7738  | 0.8153 | 0.4178 |
| global                 | 3        | 0.7924                  | 0.7615            | 0.8179 | 0.7691    | 0.8732 | 0.846   | 0.8693 | 0.5423 | 0.7088            | 0.7766 | 0.7294    | 0.8303 | 0.7883  | 0.8027 | 0.4337 |
| CTD                    | 11       | 0.8199                  | 0.8324            | 0.8678 | 0.835     | 0.9033 | 0.9161  | 0.9317 | 0.6773 | 0.7391            | 0.7831 | 0.7702    | 0.7963 | 0.8109  | 0.8407 | 0.4813 |
| composition            | 8        | 0.8106                  | 0.7801            | 0.8336 | 0.7822    | 0.8922 | 0.872   | 0.8927 | 0.5821 | 0.7053            | 0.7778 | 0.7236    | 0.8407 | 0.7793  | 0.8116 | 0.4305 |
| composition_CTD_global | 9        | 0.8213                  | 0.8332            | 0.8672 | 0.8379    | 0.8987 | 0.9214  | 0.9386 | 0.6771 | 0.7565            | 0.8025 | 0.7789    | 0.8277 | 0.8355  | 0.8563 | 0.5199 |

**Table S3.** Performance metrics of all hyperparameter trial models across the folds of 5-fold cross-validation.

| dropout rate | learning rate   | label smoothing factor | weight decay | balanced accuracy | F1            | precision     | recall        | AUC-ROC       | AUC-PR        | MCC           | loss          | fold          |
|--------------|-----------------|------------------------|--------------|-------------------|---------------|---------------|---------------|---------------|---------------|---------------|---------------|---------------|
| 0.1          | 5.00E-06        | 0                      | 0            | 0.8025            | 0.8415        | 0.8152        | 0.8696        | 0.8567        | 0.8511        | 0.6139        | 0.4673        | fold_1        |
| 0.1          | 5.00E-06        | 0                      | 0.01         | 0.7928            | 0.8295        | 0.8134        | 0.8464        | 0.8572        | 0.8681        | 0.5905        | 0.4646        | fold_1        |
| 0.1          | 5.00E-06        | 0.1                    | 0            | 0.7932            | 0.8382        | 0.8016        | 0.8783        | 0.8473        | 0.8575        | 0.6001        | 0.5128        | fold_1        |
| 0.1          | 5.00E-06        | 0.1                    | 0.01         | 0.7933            | 0.8352        | 0.8059        | 0.8667        | 0.8609        | 0.8776        | 0.5966        | 0.5153        | fold_1        |
| <b>0.1</b>   | <b>1.00E-05</b> | <b>0</b>               | <b>0</b>     | <b>0.8182</b>     | <b>0.8421</b> | <b>0.8496</b> | <b>0.8348</b> | <b>0.8815</b> | <b>0.8966</b> | <b>0.6346</b> | <b>0.4321</b> | <b>fold_1</b> |
| 0.1          | 1.00E-05        | 0                      | 0.01         | 0.8098            | 0.8467        | 0.8224        | 0.8725        | 0.8626        | 0.8703        | 0.6277        | 0.4568        | fold_1        |
| 0.1          | 1.00E-05        | 0.1                    | 0            | 0.7865            | 0.8234        | 0.8095        | 0.8377        | 0.8486        | 0.8544        | 0.577         | 0.5176        | fold_1        |
| 0.1          | 1.00E-05        | 0.1                    | 0.01         | 0.7924            | 0.8237        | 0.8213        | 0.8261        | 0.865         | 0.8827        | 0.5854        | 0.5131        | fold_1        |
| 0.3          | 5.00E-06        | 0                      | 0            | 0.7841            | 0.8195        | 0.8102        | 0.829         | 0.8349        | 0.8467        | 0.5708        | 0.485         | fold_1        |
| 0.3          | 5.00E-06        | 0                      | 0.01         | 0.7806            | 0.8261        | 0.7941        | 0.8609        | 0.8331        | 0.8202        | 0.5723        | 0.4962        | fold_1        |
| 0.3          | 5.00E-06        | 0.1                    | 0            | 0.8035            | 0.8376        | 0.8235        | 0.8522        | 0.859         | 0.8694        | 0.6112        | 0.5091        | fold_1        |
| 0.3          | 5.00E-06        | 0.1                    | 0.01         | 0.7898            | 0.8354        | 0.7989        | 0.8754        | 0.8552        | 0.8671        | 0.5932        | 0.5142        | fold_1        |
| 0.3          | 1.00E-05        | 0                      | 0            | 0.7928            | 0.8357        | 0.8043        | 0.8696        | 0.867         | 0.881         | 0.5965        | 0.4623        | fold_1        |
| 0.3          | 1.00E-05        | 0                      | 0.01         | 0.8151            | 0.8507        | 0.8274        | 0.8754        | 0.8754        | 0.8973        | 0.638         | 0.451         | fold_1        |
| 0.3          | 1.00E-05        | 0.1                    | 0            | 0.8006            | 0.8343        | 0.8225        | 0.8464        | 0.8532        | 0.8581        | 0.6046        | 0.5189        | fold_1        |
| 0.3          | 1.00E-05        | 0.1                    | 0.01         | 0.8121            | 0.8532        | 0.817         | 0.8928        | 0.8547        | 0.856         | 0.6382        | 0.5066        | fold_1        |
| 0.5          | 5.00E-06        | 0                      | 0            | 0.8059            | 0.8443        | 0.8179        | 0.8725        | 0.858         | 0.8615        | 0.6208        | 0.4822        | fold_1        |
| 0.5          | 5.00E-06        | 0                      | 0.01         | 0.7968            | 0.8256        | 0.828         | 0.8232        | 0.8529        | 0.8793        | 0.593         | 0.4858        | fold_1        |
| 0.5          | 5.00E-06        | 0.1                    | 0            | 0.7772            | 0.8264        | 0.7874        | 0.8696        | 0.8274        | 0.834         | 0.5689        | 0.5397        | fold_1        |
| 0.5          | 5.00E-06        | 0.1                    | 0.01         | 0.8045            | 0.8397        | 0.8222        | 0.858         | 0.8514        | 0.8568        | 0.6143        | 0.5224        | fold_1        |
| 0.5          | 1.00E-05        | 0                      | 0            | 0.7796            | 0.8271        | 0.791         | 0.8667        | 0.8471        | 0.858         | 0.5723        | 0.4888        | fold_1        |
| 0.5          | 1.00E-05        | 0                      | 0.01         | 0.8072            | 0.8544        | 0.8051        | 0.9101        | 0.8594        | 0.8673        | 0.6363        | 0.4546        | fold_1        |
| 0.5          | 1.00E-05        | 0.1                    | 0            | 0.7942            | 0.8373        | 0.8048        | 0.8725        | 0.8477        | 0.8471        | 0.6           | 0.5178        | fold_1        |
| 0.5          | 1.00E-05        | 0.1                    | 0.01         | 0.7967            | 0.835         | 0.8132        | 0.858         | 0.8519        | 0.8615        | 0.6003        | 0.5213        | fold_1        |
| 0.1          | 5.00E-06        | 0                      | 0            | 0.7873            | 0.8255        | 0.8061        | 0.8459        | 0.8483        | 0.8556        | 0.5804        | 0.4859        | fold_2        |
| 0.1          | 5.00E-06        | 0                      | 0.01         | 0.7689            | 0.8097        | 0.7917        | 0.8285        | 0.8331        | 0.8586        | 0.5428        | 0.5074        | fold_2        |
| 0.1          | 5.00E-06        | 0.1                    | 0            | 0.7825            | 0.821         | 0.8028        | 0.8401        | 0.8488        | 0.8684        | 0.5702        | 0.5333        | fold_2        |

|            |                 |          |          |               |               |               |               |               |               |               |               |               |
|------------|-----------------|----------|----------|---------------|---------------|---------------|---------------|---------------|---------------|---------------|---------------|---------------|
| 0.1        | 5.00E-06        | 0.1      | 0.01     | 0.7786        | 0.8187        | 0.7983        | 0.8401        | 0.8487        | 0.8677        | 0.5631        | 0.5335        | fold_2        |
| <b>0.1</b> | <b>1.00E-05</b> | <b>0</b> | <b>0</b> | <b>0.8043</b> | <b>0.8397</b> | <b>0.8199</b> | <b>0.8605</b> | <b>0.8546</b> | <b>0.86</b>   | <b>0.6146</b> | <b>0.4673</b> | <b>fold_2</b> |
| 0.1        | 1.00E-05        | 0        | 0.01     | 0.7994        | 0.829         | 0.8266        | 0.8314        | 0.8594        | 0.8798        | 0.5994        | 0.4791        | fold_2        |
| 0.1        | 1.00E-05        | 0.1      | 0        | 0.797         | 0.8345        | 0.8127        | 0.8576        | 0.8413        | 0.8491        | 0.6008        | 0.5231        | fold_2        |
| 0.1        | 1.00E-05        | 0.1      | 0.01     | 0.7999        | 0.8348        | 0.8184        | 0.8517        | 0.8386        | 0.8444        | 0.6046        | 0.5267        | fold_2        |
| 0.3        | 5.00E-06        | 0        | 0        | 0.782         | 0.8117        | 0.8152        | 0.8081        | 0.8446        | 0.8651        | 0.5632        | 0.5029        | fold_2        |
| 0.3        | 5.00E-06        | 0        | 0.01     | 0.7796        | 0.8144        | 0.8063        | 0.8227        | 0.8373        | 0.8551        | 0.5612        | 0.4989        | fold_2        |
| 0.3        | 5.00E-06        | 0.1      | 0        | 0.796         | 0.8384        | 0.8048        | 0.875         | 0.8462        | 0.85          | 0.604         | 0.5273        | fold_2        |
| 0.3        | 5.00E-06        | 0.1      | 0.01     | 0.7781        | 0.8255        | 0.7884        | 0.8663        | 0.8338        | 0.8509        | 0.5694        | 0.5388        | fold_2        |
| 0.3        | 1.00E-05        | 0        | 0        | 0.7999        | 0.8348        | 0.8184        | 0.8517        | 0.8562        | 0.875         | 0.6046        | 0.474         | fold_2        |
| 0.3        | 1.00E-05        | 0        | 0.01     | 0.7965        | 0.8223        | 0.8309        | 0.814         | 0.8534        | 0.8681        | 0.5912        | 0.482         | fold_2        |
| 0.3        | 1.00E-05        | 0.1      | 0        | 0.8033        | 0.8345        | 0.8262        | 0.843         | 0.8415        | 0.854         | 0.6088        | 0.5264        | fold_2        |
| 0.3        | 1.00E-05        | 0.1      | 0.01     | 0.7951        | 0.8302        | 0.8151        | 0.8459        | 0.8517        | 0.8673        | 0.5944        | 0.522         | fold_2        |
| 0.5        | 5.00E-06        | 0        | 0        | 0.7587        | 0.8204        | 0.7612        | 0.8895        | 0.8287        | 0.8416        | 0.5437        | 0.5172        | fold_2        |
| 0.5        | 5.00E-06        | 0        | 0.01     | 0.7641        | 0.8242        | 0.7656        | 0.8924        | 0.8291        | 0.8412        | 0.5542        | 0.5169        | fold_2        |
| 0.5        | 5.00E-06        | 0.1      | 0        | 0.7781        | 0.8224        | 0.7925        | 0.8547        | 0.8402        | 0.8455        | 0.566         | 0.5376        | fold_2        |
| 0.5        | 5.00E-06        | 0.1      | 0.01     | 0.7752        | 0.8058        | 0.8094        | 0.8023        | 0.8508        | 0.8733        | 0.5496        | 0.5434        | fold_2        |
| 0.5        | 1.00E-05        | 0        | 0        | 0.7975        | 0.8371        | 0.8098        | 0.8663        | 0.8517        | 0.8683        | 0.604         | 0.4843        | fold_2        |
| 0.5        | 1.00E-05        | 0        | 0.01     | 0.7926        | 0.8295        | 0.8111        | 0.8488        | 0.8496        | 0.8413        | 0.5907        | 0.4975        | fold_2        |
| 0.5        | 1.00E-05        | 0.1      | 0        | 0.7984        | 0.83          | 0.8229        | 0.8372        | 0.85          | 0.8698        | 0.5988        | 0.5256        | fold_2        |
| 0.5        | 1.00E-05        | 0.1      | 0.01     | 0.7883        | 0.8113        | 0.8298        | 0.7936        | 0.8414        | 0.8661        | 0.5731        | 0.5362        | fold_2        |
| 0.1        | 5.00E-06        | 0        | 0        | 0.7868        | 0.8229        | 0.809         | 0.8372        | 0.8569        | 0.8844        | 0.5775        | 0.4824        | fold_3        |
| 0.1        | 5.00E-06        | 0        | 0.01     | 0.7844        | 0.819         | 0.8097        | 0.8285        | 0.8569        | 0.8884        | 0.5712        | 0.4753        | fold_3        |
| 0.1        | 5.00E-06        | 0.1      | 0        | 0.8091        | 0.8412        | 0.8282        | 0.8547        | 0.8552        | 0.8753        | 0.622         | 0.511         | fold_3        |
| 0.1        | 5.00E-06        | 0.1      | 0.01     | 0.811         | 0.8424        | 0.8305        | 0.8547        | 0.8565        | 0.8777        | 0.6255        | 0.5067        | fold_3        |
| <b>0.1</b> | <b>1.00E-05</b> | <b>0</b> | <b>0</b> | <b>0.7883</b> | <b>0.8397</b> | <b>0.7883</b> | <b>0.8983</b> | <b>0.8556</b> | <b>0.8522</b> | <b>0.5987</b> | <b>0.4583</b> | <b>fold_3</b> |
| 0.1        | 1.00E-05        | 0        | 0.01     | 0.8052        | 0.8448        | 0.814         | 0.8779        | 0.8699        | 0.8681        | 0.6212        | 0.4604        | fold_3        |
| 0.1        | 1.00E-05        | 0.1      | 0        | 0.8062        | 0.8409        | 0.8222        | 0.8605        | 0.8832        | 0.9086        | 0.6181        | 0.4995        | fold_3        |
| 0.1        | 1.00E-05        | 0.1      | 0.01     | 0.813         | 0.8436        | 0.8329        | 0.8547        | 0.8666        | 0.8808        | 0.629         | 0.5004        | fold_3        |
| 0.3        | 5.00E-06        | 0        | 0        | 0.7883        | 0.818         | 0.8192        | 0.8169        | 0.859         | 0.8943        | 0.5763        | 0.4846        | fold_3        |

|            |                 |          |          |               |               |               |               |               |               |               |               |               |
|------------|-----------------|----------|----------|---------------|---------------|---------------|---------------|---------------|---------------|---------------|---------------|---------------|
| 0.3        | 5.00E-06        | 0        | 0.01     | 0.7994        | 0.8321        | 0.8215        | 0.843         | 0.8515        | 0.8676        | 0.6017        | 0.4814        | fold_3        |
| 0.3        | 5.00E-06        | 0.1      | 0        | 0.8159        | 0.8499        | 0.8287        | 0.8721        | 0.8629        | 0.8758        | 0.6386        | 0.4993        | fold_3        |
| 0.3        | 5.00E-06        | 0.1      | 0.01     | 0.8052        | 0.8388        | 0.8235        | 0.8547        | 0.8698        | 0.8931        | 0.6149        | 0.5052        | fold_3        |
| 0.3        | 1.00E-05        | 0        | 0        | 0.7965        | 0.835         | 0.811         | 0.8605        | 0.8692        | 0.8849        | 0.6007        | 0.4608        | fold_3        |
| 0.3        | 1.00E-05        | 0        | 0.01     | 0.7946        | 0.8368        | 0.8043        | 0.8721        | 0.8642        | 0.8794        | 0.6005        | 0.4639        | fold_3        |
| 0.3        | 1.00E-05        | 0.1      | 0        | 0.8038        | 0.8341        | 0.8281        | 0.8401        | 0.8574        | 0.8764        | 0.6091        | 0.5145        | fold_3        |
| 0.3        | 1.00E-05        | 0.1      | 0.01     | 0.7902        | 0.8257        | 0.8118        | 0.8401        | 0.8652        | 0.8758        | 0.5843        | 0.505         | fold_3        |
| 0.5        | 5.00E-06        | 0        | 0        | 0.7859        | 0.827         | 0.8011        | 0.8547        | 0.8454        | 0.8395        | 0.58          | 0.5052        | fold_3        |
| 0.5        | 5.00E-06        | 0        | 0.01     | 0.781         | 0.8257        | 0.7936        | 0.8605        | 0.8439        | 0.8461        | 0.5729        | 0.5034        | fold_3        |
| 0.5        | 5.00E-06        | 0.1      | 0        | 0.7922        | 0.8331        | 0.8049        | 0.8634        | 0.8518        | 0.8745        | 0.5937        | 0.5198        | fold_3        |
| 0.5        | 5.00E-06        | 0.1      | 0.01     | 0.7936        | 0.8317        | 0.8099        | 0.8547        | 0.8602        | 0.8833        | 0.5939        | 0.5206        | fold_3        |
| 0.5        | 1.00E-05        | 0        | 0        | 0.7955        | 0.8329        | 0.8122        | 0.8547        | 0.8583        | 0.8672        | 0.5974        | 0.4746        | fold_3        |
| 0.5        | 1.00E-05        | 0        | 0.01     | 0.797         | 0.8345        | 0.8127        | 0.8576        | 0.8605        | 0.8821        | 0.6008        | 0.4731        | fold_3        |
| 0.5        | 1.00E-05        | 0.1      | 0        | 0.8018        | 0.842         | 0.8113        | 0.875         | 0.8788        | 0.899         | 0.6143        | 0.5018        | fold_3        |
| 0.5        | 1.00E-05        | 0.1      | 0.01     | 0.7999        | 0.822         | 0.8394        | 0.8052        | 0.8745        | 0.892         | 0.5964        | 0.5089        | fold_3        |
| 0.1        | 5.00E-06        | 0        | 0        | 0.7897        | 0.8324        | 0.8011        | 0.8663        | 0.8422        | 0.8535        | 0.5902        | 0.4821        | fold_4        |
| 0.1        | 5.00E-06        | 0        | 0.01     | 0.7737        | 0.8142        | 0.795         | 0.8343        | 0.8369        | 0.8497        | 0.553         | 0.5011        | fold_4        |
| 0.1        | 5.00E-06        | 0.1      | 0        | 0.7718        | 0.813         | 0.7928        | 0.8343        | 0.8425        | 0.8519        | 0.5494        | 0.5347        | fold_4        |
| 0.1        | 5.00E-06        | 0.1      | 0.01     | 0.7946        | 0.8338        | 0.8087        | 0.8605        | 0.8669        | 0.878         | 0.5972        | 0.5011        | fold_4        |
| 0.1        | 1.00E-05        | 0        | 0        | 0.7771        | 0.8295        | 0.7815        | 0.8837        | 0.8387        | 0.8387        | 0.5736        | 0.489         | fold_4        |
| 0.1        | 1.00E-05        | 0        | 0.01     | 0.782         | 0.8247        | 0.7967        | 0.8547        | 0.8415        | 0.8467        | 0.573         | 0.4834        | fold_4        |
| 0.1        | 1.00E-05        | 0.1      | 0        | 0.7936        | 0.8377        | 0.8011        | 0.8779        | 0.8554        | 0.8596        | 0.6006        | 0.5105        | fold_4        |
| 0.1        | 1.00E-05        | 0.1      | 0.01     | 0.7883        | 0.8338        | 0.7963        | 0.875         | 0.8451        | 0.8601        | 0.5903        | 0.5206        | fold_4        |
| 0.3        | 5.00E-06        | 0        | 0        | 0.7989        | 0.8357        | 0.8149        | 0.8576        | 0.8635        | 0.8758        | 0.6043        | 0.4659        | fold_4        |
| 0.3        | 5.00E-06        | 0        | 0.01     | 0.7854        | 0.8275        | 0.7995        | 0.8576        | 0.8449        | 0.8302        | 0.5799        | 0.4876        | fold_4        |
| 0.3        | 5.00E-06        | 0.1      | 0        | 0.8028        | 0.8381        | 0.8194        | 0.8576        | 0.8568        | 0.8619        | 0.6113        | 0.511         | fold_4        |
| 0.3        | 5.00E-06        | 0.1      | 0.01     | 0.8125        | 0.8441        | 0.831         | 0.8576        | 0.8605        | 0.8778        | 0.6288        | 0.5095        | fold_4        |
| <b>0.3</b> | <b>1.00E-05</b> | <b>0</b> | <b>0</b> | <b>0.8062</b> | <b>0.8409</b> | <b>0.8222</b> | <b>0.8605</b> | <b>0.8656</b> | <b>0.8793</b> | <b>0.6181</b> | <b>0.4468</b> | <b>fold_4</b> |
| 0.3        | 1.00E-05        | 0        | 0.01     | 0.7941        | 0.8312        | 0.8116        | 0.8517        | 0.8625        | 0.8798        | 0.5941        | 0.4663        | fold_4        |
| 0.3        | 1.00E-05        | 0.1      | 0        | 0.7994        | 0.8383        | 0.812         | 0.8663        | 0.8609        | 0.871         | 0.6075        | 0.5102        | fold_4        |

|            |                 |          |          |               |               |               |               |               |               |               |               |               |
|------------|-----------------|----------|----------|---------------|---------------|---------------|---------------|---------------|---------------|---------------|---------------|---------------|
| 0.3        | 1.00E-05        | 0.1      | 0.01     | 0.8018        | 0.839         | 0.8159        | 0.8634        | 0.8643        | 0.8856        | 0.611         | 0.5057        | fold_4        |
| 0.5        | 5.00E-06        | 0        | 0        | 0.7825        | 0.8242        | 0.7984        | 0.8517        | 0.8492        | 0.8457        | 0.5731        | 0.4973        | fold_4        |
| 0.5        | 5.00E-06        | 0        | 0.01     | 0.7902        | 0.835         | 0.7984        | 0.875         | 0.8462        | 0.856         | 0.5937        | 0.4921        | fold_4        |
| 0.5        | 5.00E-06        | 0.1      | 0        | 0.7917        | 0.8336        | 0.8032        | 0.8663        | 0.838         | 0.8299        | 0.5936        | 0.5273        | fold_4        |
| 0.5        | 5.00E-06        | 0.1      | 0.01     | 0.7878        | 0.8282        | 0.8033        | 0.8547        | 0.837         | 0.8302        | 0.5834        | 0.5288        | fold_4        |
| 0.5        | 1.00E-05        | 0        | 0        | 0.7878        | 0.8282        | 0.8033        | 0.8547        | 0.8599        | 0.8696        | 0.5834        | 0.4606        | fold_4        |
| 0.5        | 1.00E-05        | 0        | 0.01     | 0.7917        | 0.821         | 0.8222        | 0.8198        | 0.8616        | 0.8823        | 0.5831        | 0.4683        | fold_4        |
| 0.5        | 1.00E-05        | 0.1      | 0        | 0.7776        | 0.826         | 0.7868        | 0.8692        | 0.8466        | 0.8659        | 0.5695        | 0.527         | fold_4        |
| 0.5        | 1.00E-05        | 0.1      | 0.01     | 0.7955        | 0.8329        | 0.8122        | 0.8547        | 0.8616        | 0.8782        | 0.5974        | 0.517         | fold_4        |
| <b>0.1</b> | <b>5.00E-06</b> | <b>0</b> | <b>0</b> | <b>0.8102</b> | <b>0.8336</b> | <b>0.8448</b> | <b>0.8227</b> | <b>0.8783</b> | <b>0.9091</b> | <b>0.6179</b> | <b>0.4405</b> | <b>fold_5</b> |
| 0.1        | 5.00E-06        | 0        | 0.01     | 0.7985        | 0.8295        | 0.8247        | 0.8343        | 0.8618        | 0.8901        | 0.5982        | 0.4601        | fold_5        |
| 0.1        | 5.00E-06        | 0.1      | 0        | 0.8087        | 0.8382        | 0.8333        | 0.843         | 0.8739        | 0.9045        | 0.6186        | 0.5027        | fold_5        |
| 0.1        | 5.00E-06        | 0.1      | 0.01     | 0.7946        | 0.8206        | 0.8304        | 0.811         | 0.8654        | 0.9051        | 0.5872        | 0.5156        | fold_5        |
| 0.1        | 1.00E-05        | 0        | 0        | 0.7971        | 0.8213        | 0.8348        | 0.8081        | 0.8664        | 0.8981        | 0.5913        | 0.4605        | fold_5        |
| 0.1        | 1.00E-05        | 0        | 0.01     | 0.7834        | 0.8258        | 0.7989        | 0.8547        | 0.8435        | 0.86          | 0.5754        | 0.5026        | fold_5        |
| 0.1        | 1.00E-05        | 0.1      | 0        | 0.7976        | 0.8174        | 0.8426        | 0.7936        | 0.8632        | 0.8918        | 0.5907        | 0.5054        | fold_5        |
| 0.1        | 1.00E-05        | 0.1      | 0.01     | 0.8024        | 0.8287        | 0.8348        | 0.8227        | 0.8656        | 0.8973        | 0.6034        | 0.5076        | fold_5        |
| 0.3        | 5.00E-06        | 0        | 0        | 0.8019        | 0.8227        | 0.844         | 0.8023        | 0.8722        | 0.9047        | 0.5999        | 0.4511        | fold_5        |
| 0.3        | 5.00E-06        | 0        | 0.01     | 0.8014        | 0.8232        | 0.8419        | 0.8052        | 0.8726        | 0.9054        | 0.5992        | 0.4514        | fold_5        |
| 0.3        | 5.00E-06        | 0.1      | 0        | 0.7898        | 0.8159        | 0.8269        | 0.8052        | 0.8542        | 0.8811        | 0.5773        | 0.5193        | fold_5        |
| 0.3        | 5.00E-06        | 0.1      | 0.01     | 0.8019        | 0.8324        | 0.8276        | 0.8372        | 0.8659        | 0.8917        | 0.605         | 0.5032        | fold_5        |
| 0.3        | 1.00E-05        | 0        | 0        | 0.8131        | 0.8338        | 0.8515        | 0.8169        | 0.8655        | 0.8904        | 0.6226        | 0.4653        | fold_5        |
| 0.3        | 1.00E-05        | 0        | 0.01     | 0.8097        | 0.8372        | 0.8372        | 0.8372        | 0.8814        | 0.9067        | 0.6193        | 0.4523        | fold_5        |
| 0.3        | 1.00E-05        | 0.1      | 0        | 0.8092        | 0.8346        | 0.8407        | 0.8285        | 0.8667        | 0.8887        | 0.6169        | 0.5091        | fold_5        |
| 0.3        | 1.00E-05        | 0.1      | 0.01     | 0.8024        | 0.8287        | 0.8348        | 0.8227        | 0.8719        | 0.897         | 0.6034        | 0.5046        | fold_5        |
| 0.5        | 5.00E-06        | 0        | 0        | 0.8087        | 0.8319        | 0.8443        | 0.8198        | 0.8739        | 0.9113        | 0.6148        | 0.4684        | fold_5        |
| 0.5        | 5.00E-06        | 0        | 0.01     | 0.7888        | 0.8203        | 0.8179        | 0.8227        | 0.8462        | 0.8598        | 0.5781        | 0.4873        | fold_5        |
| 0.5        | 5.00E-06        | 0.1      | 0        | 0.8044        | 0.8267        | 0.8429        | 0.811         | 0.8604        | 0.8903        | 0.6054        | 0.5169        | fold_5        |
| 0.5        | 5.00E-06        | 0.1      | 0.01     | 0.7902        | 0.8187        | 0.8235        | 0.814         | 0.8482        | 0.8578        | 0.5794        | 0.5234        | fold_5        |
| 0.5        | 1.00E-05        | 0        | 0        | 0.7946        | 0.8239        | 0.8251        | 0.8227        | 0.8499        | 0.8537        | 0.5889        | 0.4704        | fold_5        |

|     |          |     |      |        |        |        |        |        |        |        |        |        |
|-----|----------|-----|------|--------|--------|--------|--------|--------|--------|--------|--------|--------|
| 0.5 | 1.00E-05 | 0   | 0.01 | 0.8092 | 0.8346 | 0.8407 | 0.8285 | 0.864  | 0.8907 | 0.6169 | 0.4485 | fold_5 |
| 0.5 | 1.00E-05 | 0.1 | 0    | 0.8024 | 0.8287 | 0.8348 | 0.8227 | 0.8623 | 0.8829 | 0.6034 | 0.5041 | fold_5 |
| 0.5 | 1.00E-05 | 0.1 | 0.01 | 0.7829 | 0.82   | 0.8062 | 0.8343 | 0.8596 | 0.8834 | 0.5697 | 0.5219 | fold_5 |
